# Supplementary material for: Initiating highly efficient (Bi,Ce)2(O,S)3−xoxysulfide catalysts with rich oxygen vacancies for hydrogen evolutionviaadjusting valence band configuration
Source: Royal Society of Chemistry journal article supplement (doi:10.1039/d2ta09780j), 2023-01-01
Supplement: d2ta09780j1.pdf [file d2ta09780j1.pdf]

# Supporting Information

## **Initiating highly efficient (Bi,Ce)<sub>2</sub>(O,S)<sub>3-x</sub> oxysulfide catalyst with rich oxygen vacancies for hydrogen evolution via adjusting valence band configuration**

Xiaoyun Chen<sup>1,\*</sup>, Qinhan Wu<sup>1</sup>, Dong-Hau Kuo<sup>2,\*</sup>, Adugna Boke Abdeta<sup>1</sup>, Hanya Zhang<sup>1</sup>, Ping Li<sup>1</sup>, Ting Huang<sup>1</sup>, Osman Ahmed Zeleke<sup>3</sup>, Jinguo Lin<sup>1,\*</sup>

<sup>1</sup>College of Materials Engineering, Fujian Agriculture and Forestry University, Fuzhou 350002, China

<sup>2</sup>Department of Materials Science and Engineering, National Taiwan University of Science and Technology, Taipei 10607, Taiwan

<sup>3</sup>Department of Materials Science and Engineering, Adama Science and Technology University, Adama, Ethiopia

\*Corresponding author

*E-mail address:* [dhkuo@mail.ntust.edu.tw](mailto:dhkuo@mail.ntust.edu.tw) (D.-H. Kuo)

*E-mail address:* [fjlinjg@126.com](mailto:fjlinjg@126.com) (J. G. Lin)

*E-mail address:* [fjchenxy@126.com](mailto:fjchenxy@126.com) (X. Y. Chen)

## Experimental Section

### 1. Apparent quantum efficiency computation

According to the literature reports [1, 2] for measuring the apparent quantum efficiency (AQE). In the experiment, the 420 nm ( $\lambda$ ) monochromatic light, the 2.36 mW·cm<sup>-2</sup> average intensity of irradiation (I), and the 32.15 cm<sup>2</sup> irradiation area (A) were used. The total H<sub>2</sub> evolution with 20 mg of BiCeOS catalyst was 473.75  $\mu$ mol, which can be used to determine the number of reacted photons ( $N_{\text{reac}}$ ). The number of photons ( $N_{\text{in}}$ ) illuminated to reactor is computed according to the follow equations:

$$N_{\text{in}} = \frac{E \cdot \lambda}{h \cdot c} = \frac{(A) \cdot (I) \cdot (t) \cdot \lambda}{h \cdot c} = \frac{32.15 \times 2.36 \times 10^{-3} \times 3600 \times 5 \times 420 \times 10^{-9}}{6.626 \times 10^{-34} \times 3 \times 10^8} = 2.886 \times 10^{21}$$

$$AQE = \frac{N_{\text{reac}}}{N_{\text{in}}} \times 100\% = \frac{2 \times 6.02 \times 10^{23} \times 473.75 \times 10^{-6}}{2.886 \times 10^{21}} \times 100\% = 19.76\%$$

Where:  $h$ ,  $c$ , and  $t$  are Planck constant, light speed under vacuum, and illumination time (s), respectively.

### 2. Density functional theory calculation

DFT computation was performed with the Vienna ab initio simulation package (VASP) by using the projector augmented wave (PAW) function method [3]. A plane-wave basis set was adopted to expand the smooth part of wave functions. The generalized gradient approximation (GGA) with Perdew–Burke–Ernzerhof (PBE) function was used for considering the electron exchange and correlation effect [4, 5]. A 2  $\times$  2  $\times$  2 supercell with 80 atoms was adopted for structures considered in this study. Dispersion correction (DFT-D3) proposed by Grimme was employed to accurately describe the Van-Der-Waals force. In the process of geometry optimization, atomic relaxation was

considered by referring to the Hellmann-Feynman force smaller than 0.02 eV/Å. The convergence criterion was set to have low energy of  $1 \times 10^{-5}$  eV during the electronic self-consistent loop. The Brillouin-zone integration used the gamma-centered (2×2×1) k-point grids for the geometry optimization [6].

### **3. Cycle voltammetry (CV) curve for calculation of conduction band (CB) and valence band (VB).**

The CB and VB levels are calculated with the following Equations [7-9].

$$E_{CB} = -[4.8 + (E_{onset}^{ox} - E_{Ox})] eV \quad (1)$$

$$E_{VB} = -[4.8 + (E_{onset}^{red} - E_{Ox})] eV \quad (2)$$

where the  $E_{onset}^{ox}$ ,  $E_{onset}^{red}$ , and  $E_{Ox}$  are the onset potentials for oxidation and reduction reaction of BiCeOS-3, and for the oxidation reaction of electrolyte, respectively.

## Additional figures and tables

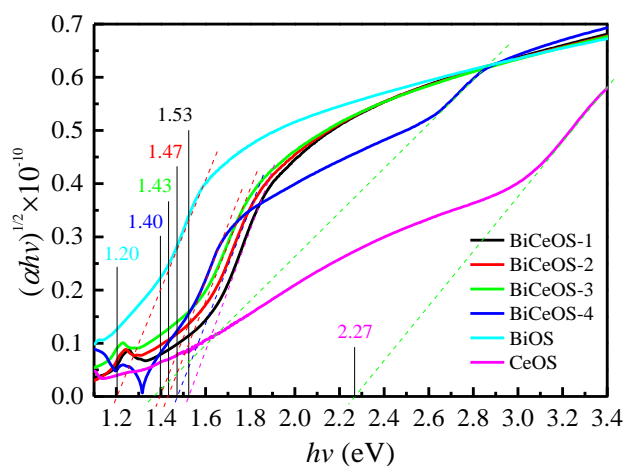

Fig. S1 the indirect bandgap  $(\alpha h\nu)^{1/2} - h\nu$  plot from the ultraviolet visible absorption spectra of CeOS, BiOS, and BiCeOS catalysts.

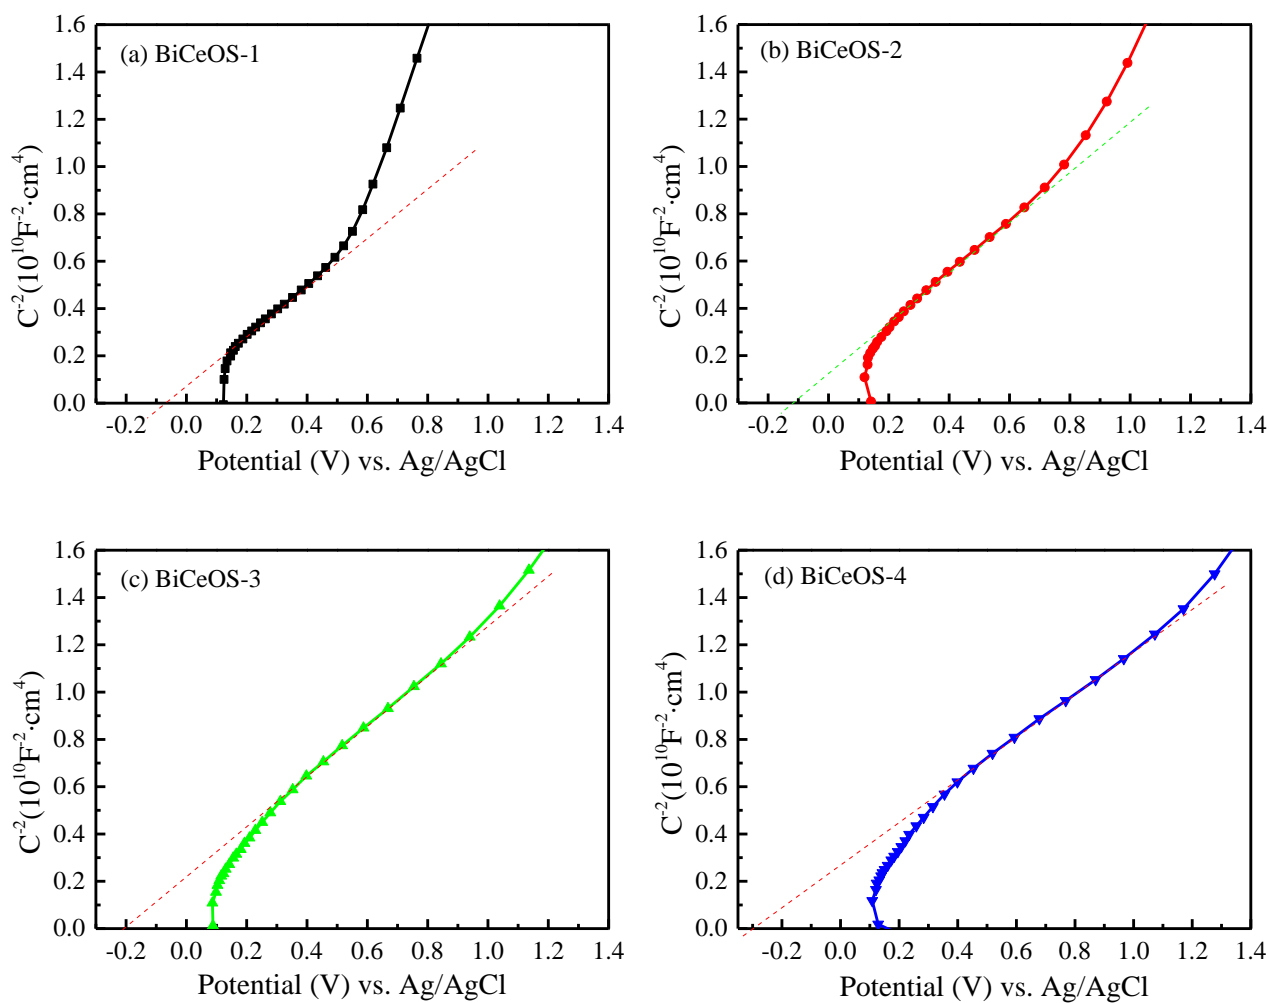

Fig. S2 Mott-Schottky curves of BiCeOS conducting at 1000 Hz.

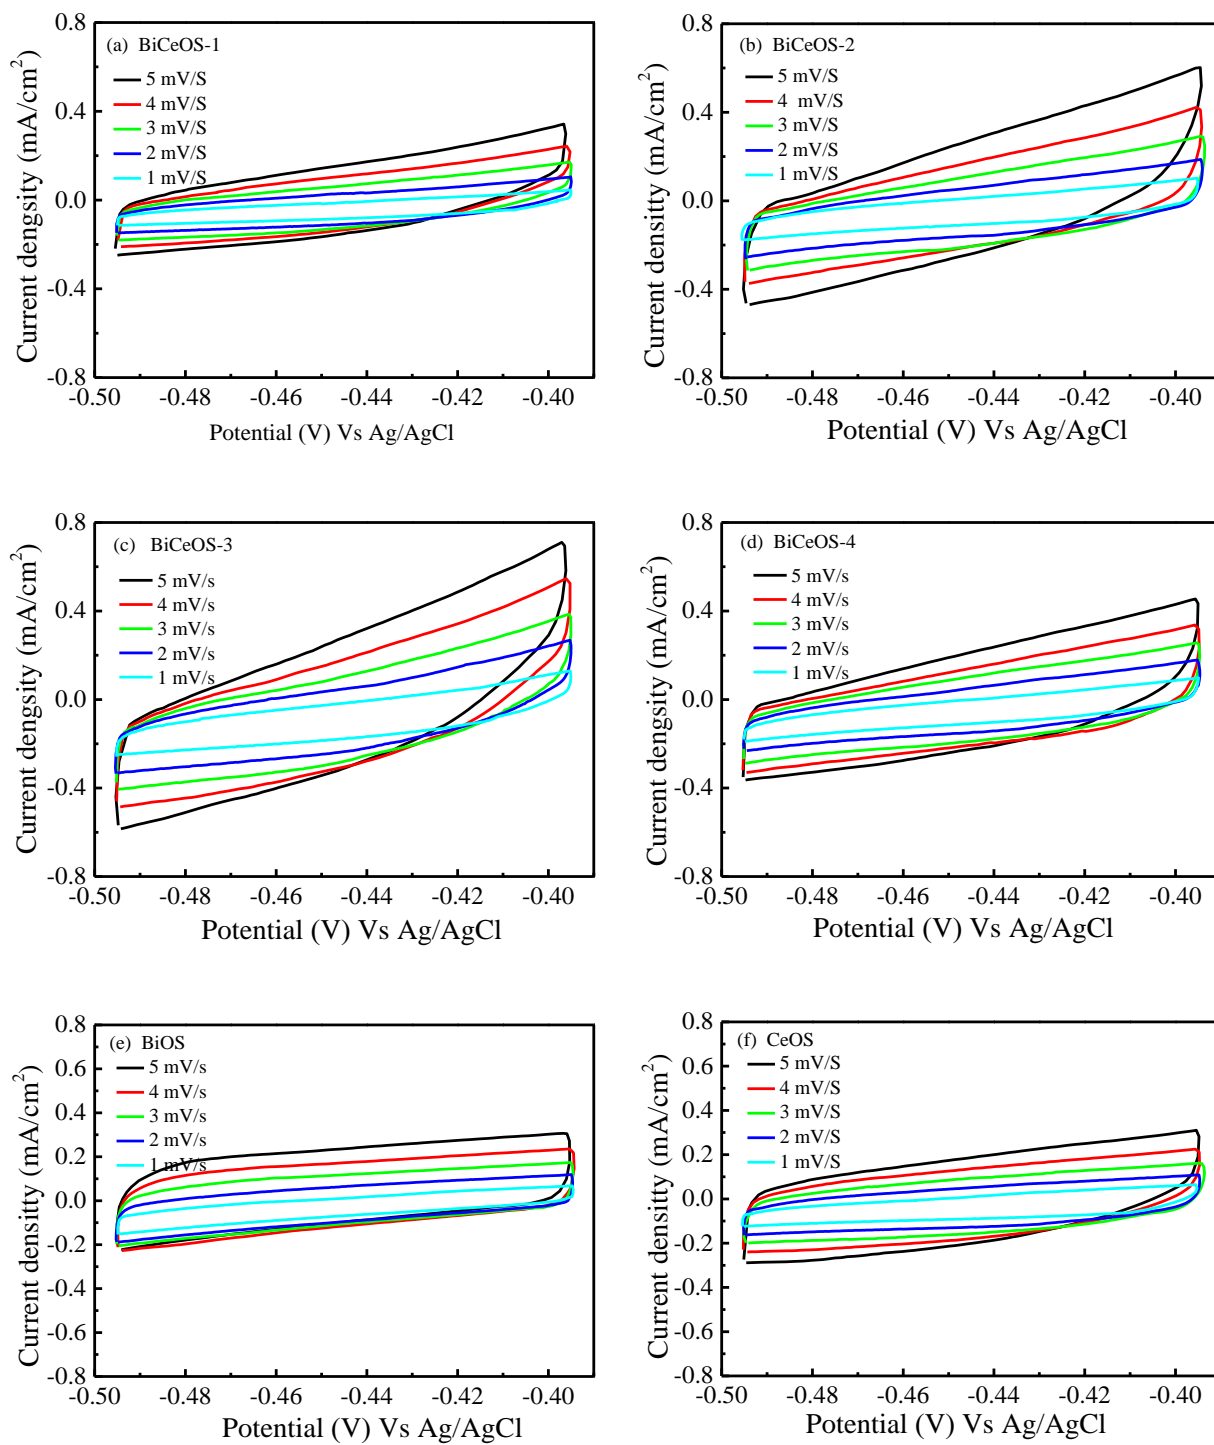

Fig. S3 Current density of BiCeOS, BiOS and CeOS under different scan rates.

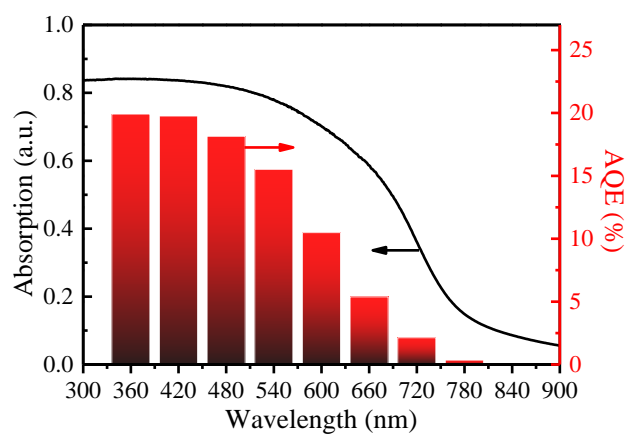

**Fig. S4** The dependence of AQE as a function of irradiation wavelength and UV-Vis absorption spectrum of BiCeOS-3.

**Table S1** XPS composition and physical characteristics of BiCeOS catalysts prepared with different  $N_2H_4$  contents

| Catalyst                | Molar percentage/% |      |       |       | Ce molar percentage /% |           | $Ce^{3+}/Ce^{4+}$ (%) | O molar percentage /% |       | $V_O/O_{Lattice}$ (%) | $S_{BET}$ ( $m^2/g$ ) | Crystal size/nm |
|-------------------------|--------------------|------|-------|-------|------------------------|-----------|-----------------------|-----------------------|-------|-----------------------|-----------------------|-----------------|
|                         | Bi                 | Ce   | S     | O     | $Ce^{3+}$              | $Ce^{4+}$ |                       | $O_{Lattice}$         | $V_O$ |                       |                       |                 |
| BiCeOS-1                | 37.28              | 6.07 | 41.28 | 15.37 | 3.12                   | 96.88     | 3.22                  | 97.39                 | 2.61  | 2.68                  | 31.2                  | 10.7            |
| BiCeOS-2                | 37.17              | 6.12 | 41.31 | 15.40 | 16.03                  | 83.97     | 19.09                 | 90.02                 | 9.98  | 11.09                 | 32.0                  | 10.5            |
| BiCeOS-3                | 37.25              | 6.09 | 41.17 | 15.49 | 39.52                  | 60.48     | 65.34                 | 84.52                 | 15.48 | 18.32                 | 30.5                  | 11.0            |
| BiCeOS-4                | 37.33              | 6.31 | 40.08 | 16.28 | 47.29                  | 52.71     | 89.72                 | 92.11                 | 7.89  | 8.57                  | 28.1                  | 11.3            |
| BiCeOS-3 after reaction | 37.28              | 6.13 | 41.05 | 15.54 | 39.48                  | 60.52     | 65.23                 | 84.82                 | 15.18 | 17.89                 | —                     | 10.8            |

**Table S2** Elements contents from SEM-EDS analysis for BiCeOS catalysts

| Catalyst | Bi    | Ce   | S     | O     | Bi/Ce (%) |
|----------|-------|------|-------|-------|-----------|
| BiCeOS-1 | 36.18 | 5.67 | 40.26 | 17.89 | 15.67     |
| BiCeOS-2 | 36.27 | 5.72 | 40.18 | 17.83 | 15.77     |
| BiCeOS-3 | 36.00 | 5.63 | 40.32 | 18.05 | 15.64     |
| BiCeOS-4 | 35.84 | 5.83 | 39.92 | 18.41 | 16.17     |

**Table S3** The average charge carrier lifetime of BiCeOS catalysts

| Catalysts | A <sub>1</sub> | τ <sub>1</sub> (ns) | A <sub>2</sub> | τ <sub>2</sub> (ns) | R <sup>2</sup> | τ <sub>avg</sub> (ns) |
|-----------|----------------|---------------------|----------------|---------------------|----------------|-----------------------|
| BiCeOS-1  | 51.961         | 1.946               | 1.406          | 5.172               | 0.991          | 2.162                 |
| BiCeOS-2  | 10.847         | 2.884               | 15.061         | 2.675               | 0.992          | 2.766                 |
| BiCeOS-3  | 9.712          | 3.097               | 12.528         | 3.956               | 0.996          | 3.632                 |
| BiCeOS-4  | 2.558          | 3.253               | 60.445         | 1.831               | 0.995          | 1.930                 |
| BiOS      | 2.181          | 5.636               | 587.359        | 0.928               | 0.992          | 1.032                 |

**Table S5** Reports on PHER performance over Bi-based and oxysulfide catalysts under visible light

| Catalysts                                                                                                         | Sacrificial                                       | Light source      | AQE (%)       | PHER rate (mmol/g·h) | Ref.      |
|-------------------------------------------------------------------------------------------------------------------|---------------------------------------------------|-------------------|---------------|----------------------|-----------|
| Cr <sub>2</sub> O <sub>3</sub> /Rh/IrO <sub>2</sub> @Y <sub>2</sub> Ti <sub>2</sub> O <sub>5</sub> S <sub>2</sub> | Na <sub>2</sub> S/Na <sub>2</sub> SO <sub>3</sub> | 300 W Xe lamp     | 5.3 (420 nm)  | 0.83                 | [10]      |
| Pt/La <sub>5</sub> In <sub>3</sub> S <sub>9</sub> O <sub>3</sub>                                                  | Na <sub>2</sub> S/Na <sub>2</sub> SO <sub>3</sub> | 300 W Xe lamp     | N/A (420 nm)  | 0.045                | [11]      |
| ZnS <sub>1-x-0.5y</sub> O <sub>x</sub> (OH) <sub>y</sub>                                                          | Na <sub>2</sub> S/Na <sub>2</sub> SO <sub>3</sub> | 400 W halide lamp | 3.0 (420 nm)  | 0.08                 | [12]      |
| InOS                                                                                                              | 10 vol.% Ethanol                                  | 150 W Xe lamp     | N/A           | 0.08                 | [13]      |
| Ni-doped Mo(S <sub>2</sub> O) <sub>3-x</sub>                                                                      | 10 vol.% Ethanol                                  | 250 W Xe lamp     | 29.2 (420 nm) | 23.50                | [14]      |
| (Ni,In)(S <sub>2</sub> O) <sub>2-x</sub>                                                                          | 10 vol.% Ethanol                                  | 250 W Xe lamp     | 26.3 (420 nm) | 19.87                | [15]      |
| Bi <sub>5</sub> Ti <sub>3</sub> CrO <sub>15</sub>                                                                 | NaSO <sub>3</sub>                                 | 300 W Xe lamp     | 3.6 (420 nm)  | 2.832                | [16]      |
| FeS <sub>2</sub> /Bi <sub>2</sub> S <sub>3</sub>                                                                  | Na <sub>2</sub> S/Na <sub>2</sub> SO <sub>3</sub> | 300 W Xe lamp     | 12.1 (420 nm) | 16.8                 | [17]      |
| Cd <sub>0.5</sub> Zn <sub>0.5</sub> S/Bi <sub>2</sub> S <sub>3</sub>                                              | Na <sub>2</sub> S/Na <sub>2</sub> SO <sub>3</sub> | 300 W Xe lamp     | 19.6 (420 nm) | 16.3                 | [18]      |
| InBi-MOF                                                                                                          | lactic acid                                       | 300 W Xe lamp     | 4.27 (420 nm) | 3.6                  | [19]      |
| Ru/SrTiO <sub>3</sub> :Rh-(PRGO/BiVO <sub>4</sub> )                                                               | MeOH                                              | 300 W Xe lamp     | 1.03 (420nm)  | 11.0                 | [20]      |
| ZnO/Ag/Bi <sub>2</sub> S <sub>3</sub>                                                                             | Na <sub>2</sub> S/Na <sub>2</sub> SO <sub>3</sub> | 250 W Hg lamp     | 1.1 (420nm)   | 0.218                | [21]      |
| Bi <sub>2</sub> S <sub>3</sub> /MoS <sub>2</sub> /TiO <sub>2</sub>                                                | Na <sub>2</sub> S/Na <sub>2</sub> SO <sub>3</sub> | 250 W Xe lamp     | N/A           | 2.23                 | [22]      |
| Bi <sub>2</sub> S <sub>3</sub> /TiO <sub>2</sub>                                                                  | 50 vol% methanol                                  | 300 W Xe lamp     | N/A           | 2.46                 | [23]      |
| MoS <sub>2</sub> /P25/Bi <sub>2</sub> S <sub>3</sub>                                                              | 10 vol% TEOA                                      | 350 W Xe lamp     | N/A           | 2.33                 | [24]      |
| BiOBr/Bi <sub>2</sub> S <sub>3</sub>                                                                              | Na <sub>2</sub> S/Na <sub>2</sub> SO <sub>3</sub> | 300 W Xe lamp     | N/A           | 0.445                | [25]      |
| BiCeOS                                                                                                            | Na <sub>2</sub> S/Na <sub>2</sub> SO <sub>3</sub> | 250 W Xe lamp     | 19.8 (420 nm) | 26.33                | This work |

## References:

- [1] Q. Huang, Y. Xiong, Q. Zhang, H. Yao, Z. Li, Noble metal-free MoS<sub>2</sub> modified Mn<sub>0.25</sub>Cd<sub>0.75</sub>S for highly efficient visible-light driven photocatalytic H<sub>2</sub> evolution, *Appl. Catal. B-Environ.*, 209 (2017) 514-522.
- [2] M.S. Nasir, G. Yang, I. Ayub, S. Wang, W. Yan, Tin diselenide a stable co-catalyst coupled with branched TiO<sub>2</sub> fiber and g-C<sub>3</sub>N<sub>4</sub> quantum dots for photocatalytic hydrogen evolution, *Appl. Catal. B-Environ.*, 270 (2020) 118900.
- [3] J.F. G. Kresse, Efficiency of ab-initio total energy calculations for metals and semiconductors using a plane-wave basis set, *Comp. Mater. Sci.*, 6 (1996) 15-50.
- [4] K.B. J.P. Perdew, M. Ernzerhof, Generalized gradient approximation made simple, *Phys. Rev. Lett.*, 77 (1996) 3865.
- [5] F.A.A.L. V. Anisimov, First-principles calculations of the electronic structure and spectra of strongly correlated systems the LDA+ U method, *J. Phys-Condens. Mat.*, 9 (1997) 767.
- [6] V.V. Anisimov, J. Zaanen, O.K. Andersen, Band theory and Mott insulators: Hubbard U instead of Stoner I, *Physical review. B, Condensed matter*, 44 (1991) 943-954.
- [7] Y. Liu, Y. Zhao, Y. Sun, J. Cao, H. Wang, X. Wang, H. Huang, M. Shao, Y. Liu, Z. Kang, A 4e<sup>-</sup>–2e<sup>-</sup> cascaded pathway for highly efficient production of H<sub>2</sub> and H<sub>2</sub>O<sub>2</sub> from water photo-splitting at normal pressure, *Appl. Catal. B-Environ.*, 270 (2020) 118875.
- [8] C. Liu, Y. Fu, Y. Xia, C. Zhu, L. Hu, K. Zhang, H. Wu, H. Huang, Y. Liu, T. Xie, J. Zhong, Z. Kang, Cascaded photo-potential in a carbon dot-hematite system driving overall water splitting under visible light, *Nanoscale*, 10 (2018) 2454-2460.
- [9] H.V. Jörn Pommerehne, Werner Guss, Rainer F. Mahrt, Heinz B äsler, Michael Porsch, Jörg Daub, Efficient two layer leds on a polymer blend basis, *Adv. Mater.*, 7 (1995) 551-554.



- [10] Q. Wang, M. Nakabayashi, T. Hisatomi, S. Sun, S. Akiyama, Z. Wang, Z. Pan, X. Xiao, T. Watanabe, T. Yamada, N. Shibata, T. Takata, K. Domen, Oxysulfide photocatalyst for visible-light-driven overall water splitting, *Nat. Mater.*, 18 (2019) 827-832.
- [11] O. Kiyonori, I. Akio, T. Kentaro, T. Kenji, H. Michikazu, D. Kazunari, Lanthanum–Indium oxysulfide as a visible light driven photocatalyst for water splitting, *Chem. Lett.*, 36 (2007) 854-855.
- [12] Y. Li, G. Ma, S. Peng, G. Lu, S. Li, Photocatalytic H<sub>2</sub> evolution over basic zincoxysulfide (ZnS<sub>1-x-0.5y</sub>O<sub>x</sub>(OH)<sub>y</sub>) under visible light irradiation, *Appl. Catal. A-Gen.*, 363 (2009) 180-187.
- [13] H. Abdullah, N.S. Gultom, D.-H. Kuo, Indium oxysulfide nanosheet photocatalyst for the hexavalent chromium detoxification and hydrogen evolution reaction, *J. Mater. Sci.*, 52 (2017) 6249-6264.
- [14] X. Chen, H. Sun, D.-H. Kuo, A.B. Abdeta, O.A. Zelekew, Y. Guo, J. Zhang, Z. Yuan, J. Lin, Spherical nanoflower-like bimetallic (Mo,Ni)(S,O)<sub>3-x</sub> sulfo-oxide catalysts for efficient hydrogen evolution under visible light, *Appl. Catal. B-Environ.*, 287 (2021) 119992.
- [15] X. Chen, T. Huang, D.-H. Kuo, H. Sun, P. Li, O.A. Zelekew, A.B. Abdeta, Q. Wu, J. Zhang, Z. Yuan, J. Lin, Material design with the concept of solid solution-type defect engineering in realizing the conversion of an electrocatalyst of NiS<sub>2</sub> into a photocatalyst for hydrogen evolution, *Appl. Catal. B-Environ.*, 298 (2021) 120542.
- [16] Z. Gu, J. Qian, R. Wang, M. Lv, X. Xu, Ch. Luo, Aurivillius compound Bi<sub>5</sub>Ti<sub>3</sub>CrO<sub>15</sub> as a visible-light-active photocatalyst for hydrogen production from water, *J. Energy Chem.*, 62 (2021) 572-580.

- [17] M. Li, J. Sun, G. Chen, S. Yao, B. Cong, P. Liu, Construction photothermal/pyroelectric property of hollow FeS<sub>2</sub>/Bi<sub>2</sub>S<sub>3</sub> nanostructure with enhanced full spectrum photocatalytic activity, *Appl. Catal. B-Environ.*, 298 (2021) 120573.
- [18] M. Li, J. Sun, B. Cong, S. Yao, G. Chen, Sulphur vacancies modified Cd<sub>0.5</sub>Zn<sub>0.5</sub>S/Bi<sub>2</sub>S<sub>3</sub>: Engineering localized surface plasma resonance enhanced visible-light-driven hydrogen evolution, *Chem. Eng. J.*, 415 (2021) 128868.
- [19] Q. Zhang, Y. Li, H. Ren, Q. Zhai, C. Zhang, L. Cheng, Engineering full hollow and yolk-shell structures of Z-scheme photocatalysts for advanced hydrogen production, *Chem. Eng. J.*, 408 (2021) 127267.
- [20] A. Iwase, Y.H. Ng, Y. Ishiguro, A. Kudo, R. Amal, Reduced graphene oxide as a solid-state electron mediator in Z-Scheme photocatalytic water splitting under visible light, *J. Am. Chem. Soc.*, 133 (2011) 11054-11057.
- [21] S. Mandal, R. Ananthkrishnan, Double effects of interfacial Ag nanoparticles in a ZnO multipod@Ag@Bi<sub>2</sub>S<sub>3</sub> Z-Scheme photocatalytic redox system: Concurrent tuning and improving charge-transfer efficiency, *Inorg. Chem.*, 59 (2020) 7681-7699.
- [22] Q.A. Drmosh, A. Hezam, A.H.Y. Hendi, M. Qamar, Z.H. Yamani, K. Byrappa, Ternary Bi<sub>2</sub>S<sub>3</sub>/MoS<sub>2</sub>/TiO<sub>2</sub> with double Z-scheme configuration as high performance photocatalyst, *Appl. Surf. Sci.*, 499 (2020) 143938.
- [23] H. Lin, K. Zhang, G. Yang, Y. Li, X. Liu, K. Chang, Y. Xuan, J. Ye, Ultrafine nano 1T-MoS<sub>2</sub> monolayers with NiO<sub>x</sub> as dual co-catalysts over TiO<sub>2</sub> photoharvester for efficient photocatalytic hydrogen evolution, *Appl. Catal. B-Environ.*, 279 (2020) 119387.

- [24] Y. Xu, J. Xu, W. Yan, H. Tang, G. Tang, Synergistic effect of a noble metal free MoS<sub>2</sub> co-catalyst and a ternary Bi<sub>2</sub>S<sub>3</sub>/MoS<sub>2</sub>/P25 heterojunction for enhanced photocatalytic H<sub>2</sub> production, *Ceram. Int.*, 47 (2021) 8895-8903.
- [25] C. Chang, C. Huang, Y. Yu, M. Teng, C. Chiang, Y. Lin, Electron transfer dynamics and enhanced H<sub>2</sub> production activity of hydrangea-like BiOBr/Bi<sub>2</sub>S<sub>3</sub>-based photocatalysts with Cu-complex as a redox mediator, *Appl. Surf. Sci.*, 576 (2022) 151870.
